# Supplementary material for: Chitoheptaose Promotes Heart Rehabilitation in a Rat Myocarditis Model by Improving Antioxidant, Anti-Inflammatory, and Antiapoptotic Properties
Source: Hindawi journal article supplement (doi:10.1155/2020/2394704), 2020-04-11
Supplement: f1 [file 2394704.f1.doc]

Figure S1. The present study of flow chart. Rat serum was used for the analysis of serum COS, serum inflammatory cytokines (ELISA analysis). Rat heart tissues were used for the analysis of oxidative stress markers, H&E staining (severity scores of myocarditis), IHC staining, RT-qPCR and Western Blot.

Figure S2. H&E staining of heart disease among different groups. CG, control group. MG, model group. PG, chitopentaose-treated group. HexG, chitohexaose-treated group. HepG, chitohexptaose-treated group. OG, chitooctaose-treated group.

Figure S3. Relative protein levels of apoptotic factors among different groups. A, caspase 3. B, Bcl-2-associated X protein (BAX). C, B-cell lymphoma 2 (BCL-2). CG, control group. MG, model group. PG, chitopentaose-treated group. HexG, chitohexaose-treated group. HepG, chitohexptaose-treated group. OG, chitooctaose-treated group. n=8 for each group. ap < 0.05 vs the CG group, bp < 0.05 vs the MG group, cp < 0.05 vs the PG group, dp < 0.05 vs the HexG group, ep < 0.05 vs the HepG group and fp < 0.05 vs the OG group. Three samples were measured from each group with the number 1, 2 and 3. Supplementary Figure S2 showed Western Blot analysis of the samples 2 and 3 from each group.

Figure S4. IHC staining of apoptic factor expression in heart tissues among different groups. A, caspase 3. B, BAX. C, Bcl-2.
